# Supplementary material for: Rosin Derivatives as a Platform for the Antiviral Drug Design
Source: MDPI journal article supplement (doi:10.3390/molecules26133836), 2021-06-23
Supplement: s1 [file s1]

## SUPPLEMENTARY MATERIALS

### Biological activity prediction using PASS-online modeling

Table S1. Biological activity prediction of 12-sulfodehydroabietic acid (I)

| №  | Activity                                                  | Activity probability<br>Pa | Inactivity probability<br>Pi | Compound                                                                             |
|----|-----------------------------------------------------------|----------------------------|------------------------------|--------------------------------------------------------------------------------------|
| 1  | Mucomembranous protector                                  | 0.930                      | 0.004                        | 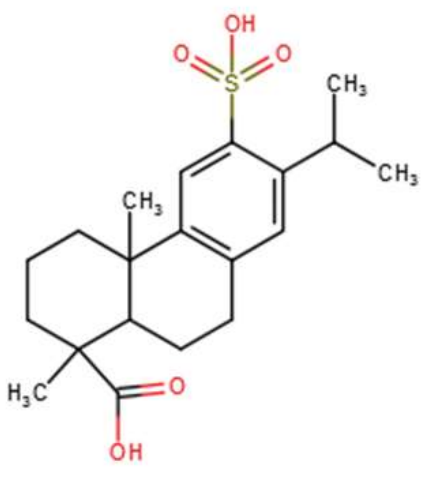 |
| 2  | Oxidoreductase inhibitor                                  | 0.875                      | 0.003                        |                                                                                      |
| 3  | Antihypercholesterolemic                                  | 0.853                      | 0.004                        |                                                                                      |
| 4  | Acute neurologic disorders treatment                      | 0.844                      | 0.006                        |                                                                                      |
| 5  | Glyceryl-ether monooxygenase inhibitor                    | 0.826                      | 0.004                        |                                                                                      |
| 6  | Antiviral (Influenza)                                     | 0.801                      | 0.003                        |                                                                                      |
| 7  | Membrane permeability inhibitor                           | 0.787                      | 0.012                        |                                                                                      |
| 8  | Alcohol O-acetyltransferase inhibitor                     | 0.757                      | 0.003                        |                                                                                      |
| 9  | Cholestanetriol 26-monooxygenase inhibitor                | 0.728                      | 0.006                        |                                                                                      |
| 10 | Trans-1,2-dihydrobenzene-1,2-diol dehydrogenase inhibitor | 0.726                      | 0.003                        |                                                                                      |
| 11 | Testosterone 17beta-dehydrogenase (NADP+) inhibitor       | 0.751                      | 0.039                        |                                                                                      |
| 12 | Vasoprotector                                             | 0.719                      | 0.009                        |                                                                                      |

TableS2. Biological activity prediction of potassium 12-bromodehydroabietate (III)

| No | Activity                                               | Activity probability<br>Pa | Inactivity probability<br>Pi | Compound                                                                            |
|----|--------------------------------------------------------|----------------------------|------------------------------|-------------------------------------------------------------------------------------|
| 1  | Mucomembranous protector                               | 0.928                      | 0.004                        | 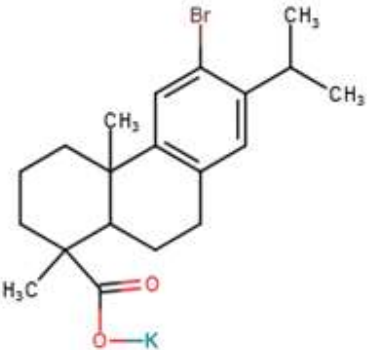 |
| 2  | Testosterone 17beta-dehydrogenase<br>(NADP+) inhibitor | 0.814                      | 0.022                        |                                                                                     |
| 3  | CYP2J substrate                                        | 0.791                      | 0.023                        |                                                                                     |
| 4  | Antiviral (Influenza)                                  | 0.702                      | 0.005                        |                                                                                     |

Table S3. Biological activity prediction of potassium 12-sulfodehydroabietate (IV)

| No | Activity                                            | Activity probability<br>Pa |       | Inactivity probability<br>Pi |       | Compound                                                                            |                                                                                     |
|----|-----------------------------------------------------|----------------------------|-------|------------------------------|-------|-------------------------------------------------------------------------------------|-------------------------------------------------------------------------------------|
|    |                                                     |                            |       |                              |       |                                                                                     |                                                                                     |
| 1  | Mucomembranous protector                            | 0.976                      | 0.969 | 0.002                        | 0.002 | 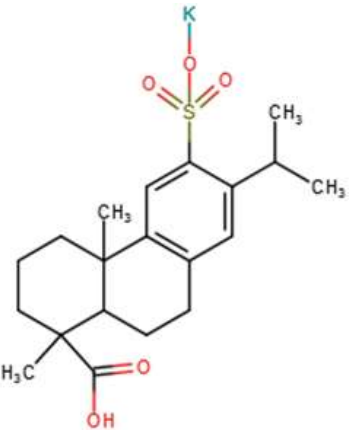 |  |
| 2  | Urease inhibitor                                    | 0.846                      | 0.755 | 0.001                        | 0.002 |                                                                                     |                                                                                     |
| 3  | Gastrin inhibitor                                   | 0.710                      | -     | 0.004                        | -     |                                                                                     |                                                                                     |
| 4  | Testosterone 17beta-dehydrogenase (NADP+) inhibitor | 0.722                      | -     | 0.048                        | -     |                                                                                     |                                                                                     |

TableS4. Biological activity prediction of 12-bromodehydroabietic acid (X)

| No | Activity                                            | Activity probability<br>Pa | Inactivity probability<br>Pi | Compound                                                                            |
|----|-----------------------------------------------------|----------------------------|------------------------------|-------------------------------------------------------------------------------------|
| 1  | Mucomembranous protector                            | 0.959                      | 0.003                        | 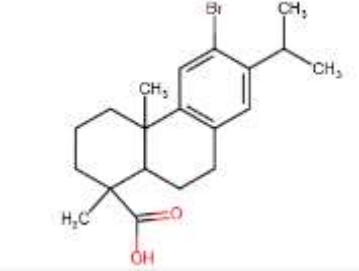 |
| 2  | Testosterone 17beta-dehydrogenase (NADP+) inhibitor | 0.859                      | 0.013                        |                                                                                     |
| 3  | Oxidoreductase inhibitor                            | 0.800                      | 0.006                        |                                                                                     |
| 4  | CYP2J substrate                                     | 0.805                      | 0.020                        |                                                                                     |
| 5  | Antiviral (Influenza)                               | 0.768                      | 0.003                        |                                                                                     |
| 6  | Antieczematic                                       | 0.725                      | 0.038                        |                                                                                     |

Table S5. Biological activity prediction of abietinol (**XI**) ( $P_a > 0.7$ )

| No | Activity                                            | Activity probability<br>$P_a$ (%) | Inactivity probability |
|----|-----------------------------------------------------|-----------------------------------|------------------------|
| 1  | Alkenylglycerophosphocholine hydrolase inhibitor    | 0.836 ( <b>84</b> )               | 0.013                  |
| 2  | Oxidoreductase inhibitor                            | 0.820 ( <b>82</b> )               | 0.005                  |
| 3  | Antihypercholesterolemic                            | 0.811 ( <b>81</b> )               | 0.005                  |
| 4  | Transcription factor stimulant                      | 0.788 ( <b>79</b> )               | 0.003                  |
| 5  | Transcription factor NF kappa B stimulant           | 0.788 ( <b>79</b> )               | 0.003                  |
| 6  | CYP2J substrate                                     | 0.794 ( <b>79</b> )               | 0.022                  |
| 7  | Mucomembranous protector                            | 0.784 ( <b>78</b> )               | 0.023                  |
| 8  | Antieczematic                                       | 0.768 ( <b>77</b> )               | 0.026                  |
| 9  | Hepatoprotectant                                    | 0.724 ( <b>72</b> )               | 0.006                  |
| 10 | Alkylacetylgllycerophosphatase inhibitor            | 0.723 ( <b>72</b> )               | 0.017                  |
| 11 | Antineoplastic                                      | 0.717 ( <b>72</b> )               | 0.023                  |
| 12 | Testosterone 17beta-dehydrogenase (NADP+) inhibitor | 0.711 ( <b>71</b> )               | 0.051                  |
| 13 | Caspase 3 stimulant                                 | 0.706 ( <b>71</b> )               | 0.011                  |

- The prediction results are presented to the user in the form of a list of names of activity probable types with estimated probabilities of the presence ( $P_a$ ) and absence of each type of activity ( $P_i$ ). They have values from 0 to 1. These probabilities are calculated independently from subsamples of active and inactive compounds, and therefore their sum is not equal to one.  $P_a$  and  $P_i$  are interpreted as estimates of the measure of a substance belonging to the classes of active and inactive compounds, respectively, or as estimates of errors of the first and second kind. The higher the  $P_a$  value for a particular activity and the lower the  $P_i$  value, the greater the chance of detecting this activity in the experiment.

## Revealing the drug-like properties of compounds using SWISS-ADME web server

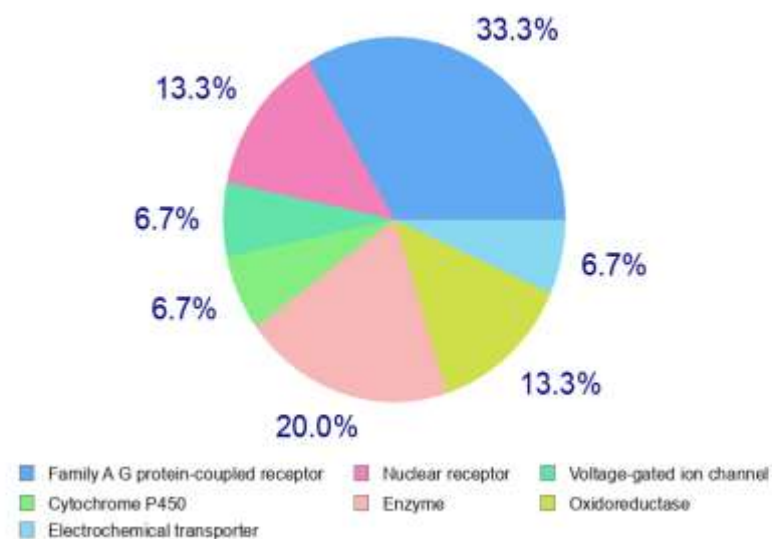

Figure S1. Target proteins - top 15 most likely activities of 12-sulfodehydroabietic acid (I)

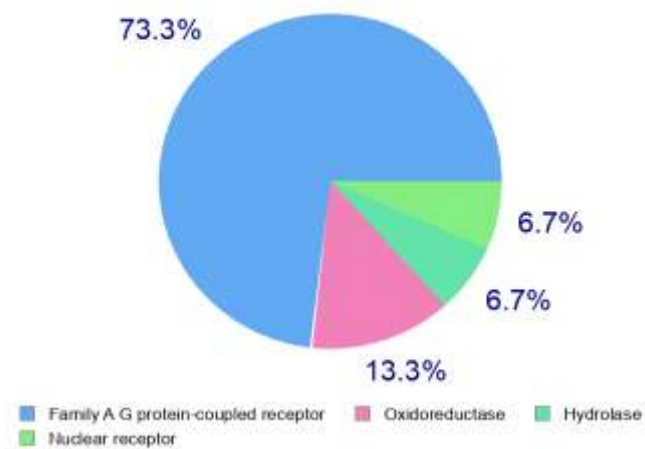

Figure S2. Target proteins - top 15 most likely activities of potassium 12-bromodehydroabietate (III)

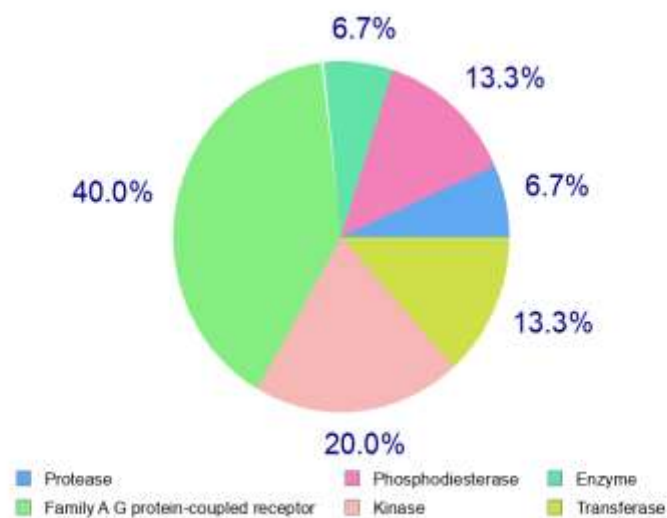

Figure S3. Target proteins - top 15 most likely activities of potassium 12-sulfodehydroabietate (IV)



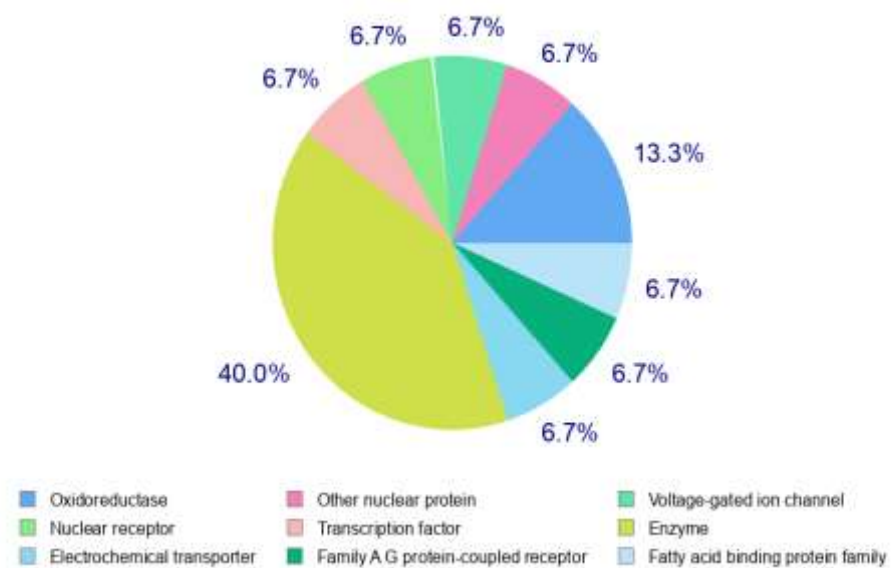

Figure S4. Target proteins - top 15 most likely activities of 12-bromodehydroabiatic acid (X)

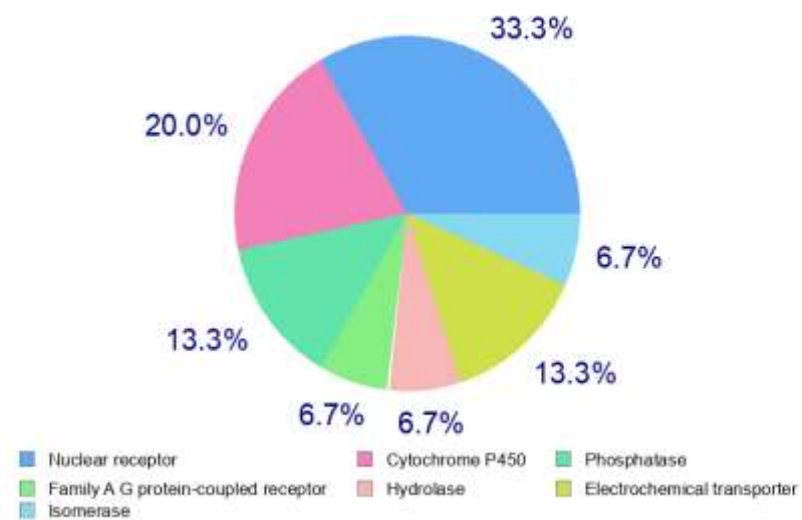

Figure S5. Target proteins - top 15 most likely activities of abietinol (XI)
